# Supplementary material
Source: ML conference proceedings conference paper supplement (https://openreview.net/forum?id=4iQuByhNie)
Supplement: supplementary_material [file attachment]

## Sheet: Sheet1
aapl	320193
msft	789019
googl	1652044
amzn	1018724
tsla	1318605
brk-b	1067983
fb	1326801
nvda	1045810
tsm	1046179
unh	731766
jnj	200406
cnttq	1652499
wmt	104169
pg	80424
spy	884394
xom	34088
jpm	19617
ma	1141391
lvmuy	824046
hd	354950
cvx	93410
bac	70858
lly	59478
ko	21344
baba	1577552
pfe	78003
abbv	1551152
nvo	353278
tm	1094517
avgo	1730168
cost	909832
pep	77476
asml	937966
mrk	310158
tmo	97745
csco	858877
dis	1744489
azn	901832
nke	320187
abt	1800
orcl	1341439
nvs	1114448
vz	732712
adbe	796343
acn	1467373
cmcsa	1166691
mcd	63908
intc	50863
dhr	313616
crm	1108524
wfc	72971
bhp	811809
bmy	14272
asti	1350102
qcom	804328
txn	97476
lin	1707925
tmus	1283699
ups	1090727
pm	1413329
unp	100885
ms	895421
ptr	1108329
ry	1000275
rtx	101829
mdt	1613103
nee	753308
low	60667
t	732717
hon	773840
sny	1121404
axp	4962
td	947263
tte	879764
amgn	318154
schw	316709
cvs	64803
cop	1163165
rtntf	887028
hsbc	1089113
qqq	1067839
sap	1000184
intu	896878
antm	1156039
ibm	51143
lmt	936468
de	315189
ul	217410
rio	863064
deo	835403
cat	18230
pld	1045609
gsk	1131399
eqnr	1140625
tgt	27419
amt	1053507
sony	313838
pypl	1633917
amd	2488
jd	1549802
gs	886982
hdb	1144967
mo	764180
amat	6951
bud	1668717
abnb	1559720
c	831001
now	1373715
blk	1364742
bti	1303523
bp	313807
el	1001250
adp	8670
lfc	1268896
syk	310764
bkng	1075531
mdlz	1103982
spgi	64040
nflx	1065280
cb	896159
enb	895728
ba	12927
eadsy	1378580
isrg	1035267
infy	1067491
pbr	1119639
mmm	66740
duk	1326160
cni	16868
ge	40545
zts	1555280
adi	6281
ci	1739940
glncy	1524684
mmc	62709
vale	917851
mu	723125
bam	1001085
cci	1051470
cme	1156375
so	92122
chtr	1091667
snp	1123658
mufg	67088
bns	9631
csx	277948
gild	882095
bx	1393818
tjx	109198
usb	36104
cnq	1017413
pnc	713676
shw	89800
sftby	1065521
regn	872589
dmlry	1067318
bdx	10795
pbcry	1463157
noc	1133421
bmo	927971
eog	821189
lrcx	707549
ibn	1103838
cp	16875
idexy	1438656
vrtx	875320
wm	823768
enlay	1096200
d	715957
hca	860730
ew	1099800
tfc	92230
gd	40533
ntes	1110646
pgr	80661
fisv	798354
ice	1571949
cl	21665
eqix	1101239
psa	1393311
amx	1129137
itw	49826
nsc	702165
aon	315293
cta-pa	30554
atvi	718877
abb	1091587
team	1650372
fis	1136893
bsx	885725
fcx	831259
uber	1543151
etn	1551182
ubs	1610520
mar	1048286
nem	1164727
mrna	1682852
pxd	1038357
f	37996
shop	1594805
relx	929869
ntr	1725964
panw	1327567
mco	1059556
rbgly	1420798
pdd	1737806
epd	1061219
gm	1467858
hum	49071
met	1099219
mpc	1510295
slb	87347
dg	29534
oxy	797468
snow	1640147
prndy	899108
cof	927628
emr	32604
ngg	1004315
race	1648416
atlcy	748954
su	311337
fdx	1048911
wday	1327811
apd	2969
trp	1232384
kdp	1418135
khc	1637459
sre	1032208
mrvl	1835632
meli	1099590
e	1002242
adm	7084
cm	1045520
dow	1751788
klac	319201
se	1703399
san	891478
aig	5272
sq	1512673
chgcy	1453934
aep	4904
tri	1075124
rop	882835
bce	718940
scco	1001838
ftnt	1262039
vlo	1035002
snap	1564408
ecl	31462
nxpi	1413447
ilmn	1110803
mck	927653
crwd	1535527
lulu	1397187
bsbr	1471055
lhx	202058
cnc	1071739
vmw	1124610
payx	723531
kmb	55785
stz	16918
exc	1109357
itub	1132597
gld	1222333
tak	1395064
hmc	715153
abev	1565025
bidu	1329099
mnst	865752
hsy	47111
snps	883241
syy	96021
hlt	1585689
jci	833444
nue	73309
ctsh	1058290
aph	820313
adsk	769397
stla	1605484
gis	40704
trv	86312
wmb	107263
ctva	1755672
cdns	813672
rsg	1060391
iqv	1478242
azo	866787
kmi	1506307
orly	898173
cmg	1058090
tel	1385157
pru	1137774
vod	839923
smfg	1022837
ctas	723254
lyg	1160106
hpq	47217
dlr	1297996
dvn	1090012
kr	56873
gold	756894
dxcm	1093557
twtr	1418091
well	766704
xel	72903
psx	1534701
danoy	1048515
spg	1063761
o	726728
mfc	1086888
mchp	827054
ifnny	1107457
ddog	1561550
afl	4977
cve	1475260
sbac	1034054
wba	1618921
dltr	935703
idxx	874716
all	899051
msi	68505
anet	1596532
dell	1571996
gpn	1123360
lyb	1489393
ing	1039765
et	1276187
a	1090872
rost	745732
wcn	1318220
bax	10456
bntx	1776985
imo	49938
bk	1390777
wit	1123799
ph	76334
msci	1408198
peg	788784
alc	1167379
lng	3570
puk	1116578
iau	1278680
ajg	354190
dd	1666700
ea	712515
yum	1041061
stm	932787
cht	1132924
bbd	1160330
tsn	100493
tu	868675
bbva	842180
tt	1466258
carr	1783180
tdg	1260221
ebay	1065088
ec	1444406
dfs	1393612
mplx	1552000
vrsk	1442145
ed	1047862
odfl	878927
hal	45012
ttd	1671933
coin	1679788
net	1477333
hes	4447
fast	815556
expgy	1376891
wec	783325
lcid	1811210
bcs	312069
zm	1585521
oran	1038143
abc	1140859
ppg	79879
otis	1781335
tlk	1001807
kkr	1404912
apo	1858681
iff	51253
avb	915912
glw	24741
codyy	1012037
nwg	844150
crh	849395
biib	875045
bf-a	14693
dnbby	1498632
hcmly	948696
mfg	1335730
eqr	906107
wy	106535
amp	820027
mtd	1037646
es	72741
arzgy	1379235
baesy	895564
lgfry	1554394
aptv	1521332
sivb	719739
zs	1713683
pcar	75362
ame	1037868
rmd	943819
rok	1024478
nok	924613
slf	1097362
veev	1393052
fnv	1456346
trow	1113169
gfs	1709048
oke	1039684
pcg	1004980
dash	1792789
hrl	48465
rivn	1874178
lvs	1300514
ppery	1461748
nio	1736541
cmi	26172
tef	814052
rweoy	939380
luv	92380
are	1035443
cbre	1138118
ferg	1832433
nu	1691493
cern	804753
frc	1132979
cprt	900075
dal	27904
eric	717826
rci	733099
awk	1410636
dia	1041130
bkr	1701605
ckhuy	1637120
expe	1324424
fmx	1061736
mt	1243429
ndaq	1120193
mkc	63754
bll	9389
keys	1601046
eix	827052
fitb	35527
tscdy	885834
cqp	1383650
csgp	1057352
mdy	936958
gww	277135
dhi	882184
zbh	1136869
gwlif	850918
stt	93751
efx	33185
ibkr	1381197
caixy	1535628
dte	936340
poahy	1450346
exr	1289490
fe	1031296
algn	1097149
anss	1013462
vwdry	1330306
cpng	1834584
wegzy	1445166
siri	908937
li	1791706
chd	313927
mdb	1441816
on	1097864
sgen	1060736
hig	874766
caj	16988
it	749251
etr	65984
aee	1002910
len	920760
lyv	1335258
ctra	858470
tsco	916365
lh	920148
phg	313216
zto	1677250
wst	105770
mos	1285785
xpev	1810997
fang	1539838
k	55067
invh	1687229
ccep	1650107
gmab	1434265
mtch	891103
vmc	1396009
fts	1666175
enph	1463101
bby	764478
ste	1757898
alb	915913
hznp	1492426
uri	1067701
vtr	740260
edu	1372920
cdw	1402057
mgddy	896076
mlm	916076
ulta	1403568
maa	912595
ntrs	73124
ttm	926042
mtb	36270
ix	1070304
pltr	1321655
grmn	1121788
anyyy	1700171
ppl	922224
db	1159508
ftv	1659166
twlo	1447669
teck	886986
ptaiy	1455967
sqm	909037
pcrfy	63271
spot	1639920
ess	920522
cf	1324404
pba	1546066
vfc	103379
syf	1601712
rjf	720005
clr	732834
zbra	877212
ccl	815097
flt	1175454
umc	1033767
foxa	1754301
dre	783280
lnngy	1447629
rf	1281761
u	1810806
atasy	1437775
swk	93556
tdy	1094285
rcl	884887
wpm	1323404
hpe	1645590
zi	1794515
ryaay	1038683
sui	912593
mgm	789570
splk	1353283
cms	811156
swks	4127
hban	49196
cnhi	1567094
cinf	20286
vrsn	1014473
mro	101778
gib	1061574
dov	29905
okta	1660134
lbrda	1611983
avtr	1722482
cnp	1130310
mpwr	1280452
rblx	1315098
hldcy	811250
pki	31791
iclr	1060955
gpc	40987
hubs	1404655
wat	1000697
cuk	1125259
mkl	1096343
bip	1406234
stx	1137789
bxp	1037540
holx	859737
mga	749098
vici	1705696
pfg	1126328
akam	1086222
rprx	1802768
ir	1699150
key	91576
fms	1333141
ip	51434
qsr	1618756
acc	1283630
bill	1786352
rkt	1805284
yumc	1673358
moh	1179929
amcr	1748790
jbht	728535
kb	1445930
snmry	1437771
j	52988
hei	46619
ts	1190723
ui	1511737
acgl	947484
ter	97210
elp	1041792
coo	711404
bgne	1651308
payc	1590955
clx	21076
peak	765880
pkx	889132
dri	940944
wab	943452
viv	1066119
chkp	1015922
podd	1145197
trgp	1389170
docu	1261333
expd	746515
bro	79282
agr	1634997
trmb	864749
shg	1263043
wdc	106040
incy	879169
cfg	759944
tru	1552033
fmc	37785
br	1383312
stld	1022671
pwr	1050915
pool	945841
alny	1178670
ssnc	1402436
ntap	1002047
cag	23217
epam	1352010
cah	721371
rol	84839
omc	29989
tw	1758730
wlk	1262823
ual	100517
dgx	1022079
tyl	860731
bg	1144519
cs	1159510
udr	74208
ce	1306830
car	723612
entg	1101302
wmg	1319161
l	60086
lsxma	1560385
evrg	1711269
prdsy	1527249
txt	217346
nvr	906163
ctlt	1596783
zshgy	1495686
cpt	906345
argx	1697862
lpla	1397911
bmrn	1048477
pkg	75677
tsgty	939383
kim	879101
tcom	1269238
sbny	1288784
ssl	314590
tech	842023
bio	12208
fds	1013237
eqt	33213
pubgy	1050952
zen	1463172
ato	731802
avy	8818
nlok	849399
xyl	1524472
kmx	1170010
iep	813762
app	1751008
sjr	932872
znh	1041668
irm	1020569
dish	1001082
lkq	1065696
wpc	1025378
sjm	91419
czr	1590895
ldos	1336920
lnt	352541
aci	1646972
iex	832101
pins	1506293
hwm	4281
hst	1070750
wpp	806968
gnrc	1474735
icl	941221
snn	845982
cpb	16732
jkhy	779152
chrw	1043277
cck	1219601
ttwo	946581
ally	40729
aem	2809
burl	1579298
smpny	1669414
bbwi	701985
roku	1428439
els	895417
asx	1122411
lu	1816007
emn	915389
aes	874761
frfhf	915191
csl	790051
gddy	1609711
suz	909327
ptc	857005
xp	1787425
sedg	1419612
jrony	1438077
ovv	1792580
tfx	96943
cg	1527166
qrvo	1604778
wrk	1732845
nice	1003935
clf	764065
abmd	815094
mas	62996
ipg	51644
amh	1562401
bouyy	1445475
dpz	1286681
jhx	1159152
gshn	1639327
chwy	1766502
ndsn	72331
ben	38777
plug	1093691
ctxs	877890
lbtya	1570585
rs	861884
emraf	1127248
has	46080
crl	1100682
vtrs	1792044
swmay	1011218
ebr	1439124
etsy	1370637
dar	916540
aap	1158449
cna	21175
fhn	36966
ach	1161611
vivhy	1127055
aa	1675149
gfi	1172724
bldr	1316835
nwsa	1564708
aal	6201
lnegy	1437041
vst	1692819
elan	1739104
cboe	1374310
ihg	858446
cgnx	851205
tap	24545
bntgy	1533945
jxhly	1487533
afg	1042046
eqh	1333986
wrb	11544
bsy	1031308
lnvgy	932477
grab	1855612
nmr	1163653
enia	912505
rexr	1571283
reg	910606
y	775368
ares	1176948
sna	91440
cea	1030475
kep	887225
aer	1378789
fnf	1331875
dt	1773383
ni	1111711
whr	106640
wtrg	78128
hsic	1000228
kof	910631
wolf	895419
ptbry	1504122
logi	1032975
lamr	1090425
lnc	59558
bah	1443646
bap	1001290
re	1095073
dva	927066
rhi	315213
rpm	110621
jll	1037976
otex	1002638
morn	1289419
ar	1433270
rkuny	1294591
cma	28412
glpi	1575965
mpw	1287865
phm	822416
lyft	1759509
ggg	42888
sci	89089
pcty	1591698
clvt	1764046
cvna	1690820
azpn	929940
uhal	4457
hubb	48898
ffiv	1048695
qgen	1015820
xm	1747748
tpl	1811074
lumn	18926
lsi	944314
jnpr	1043604
ewbc	1069157
grfs	1438569
aeg	769218
h	1468174
wso	105016
mtn	812011
zg	1617640
kkoyy	1436794
aiz	1267238
alle	1579241
mmp	1126975
fico	814547
ccj	1009001
cube	1298675
wsm	719955
glpey	1385535
gfl	1780232
acm	868857
bki	1627014
mktx	1278021
bch	1161125
gl	320335
exas	1124140
skm	1015650
wes	1423902
remyy	1552653
mhk	851968
dox	1062579
uhs	352915
tost	1650164
htht	1483994
path	1734722
bz	1842827
slvyy	930826
jazz	1232524
fbhs	1519751
chk	895126
snx	1177394
agco	880266
nlsn	1492633
lw	1679273
plan	1540755
sbsw	1786909
bep	1533232
aqn	1174169
didi	1764757
nwl	814453
see	1012100
ndvly	800928
wfg	1402388
htz	1657853
nly	1043219
aos	91142
teva	818686
oln	74303
oc	1370946
znga	1439404
dqjcy	1446597
uso	1327068
olpx	1868726
glob	1557860
eslt	1027664
tpr	1116132
ggb	1073404
armk	1584509
bili	1723690
arcc	1287750
cib	1071371
gme	1326380
w	1616707
five	1177609
nrg	1013871
s	1583708
bsac	1027552
frt	34903
mdiby	1379481
zion	109380
bwa	908255
fnd	1507079
lad	1023128
rdy	1135951
brkr	1109354
rrx	82811
uelmo	100826
rgen	730272
hood	1783879
bj	1531152
cien	936395
nvcr	1645113
dscsy	1671750
ivz	914208
xray	818479
cday	1725057
midd	769520
mat	63276
nbix	914475
dks	1089063
pstg	1474432
erie	922621
tx	1342874
rgld	85535
pnr	77360
hii	1501585
wf	1264136
accyy	1049183
usfd	1665918
afrm	1820953
ttc	737758
dbx	1467623
cbsh	22356
hcp	1720671
pag	1019849
cfr	39263
jbl	898293
prymy	1437672
nfe	1749723
arw	7536
manh	1056696
au	1067428
wynn	1174922
nclh	1513761
wh	1722684
cflt	1699838
chdn	20212
alsmy	1062066
bsmx	1698287
kss	885639
nvei	1765159
cnxc	1803599
rng	1384905
ogn	1821825
wal	1212545
uthr	1082554
krc	1025996
aseky	1450206
onon	1858985
x	1163302
pnw	764622
knx	1492691
jpxgy	1600520
dlb	1308547
lii	1069202
axon	1069183
pac	1347557
fivn	1288847
cae	1173382
leco	59527
rl	1037038
seic	350894
fslr	1274494
jef	96223
an	350698
flex	866374
wsc	1647088
docs	1516513
pfgc	1618673
rrc	315852
hnp	929058
chh	1046311
lea	842162
amc	1411579
bery	1378992
tme	1744676
oge	1021635
thc	70318
cms-pb	201533
airc	1820877
phi	78150
levi	94845
iac	1800227
ttek	831641
nnn	751364
adooy	1489079
che	19584
stor	1538990
synh	1610950
deck	910521
swch	1710583
casy	726958
swn	7332
rh	1528849
csan	1430162
cacc	885550
atr	896622
g	1398659
m	794367
tfii	1588823
dxc	1688568
brx	1581068
paa	1070423
pcor	1611052
cpri	1530721
wms	1604028
gtlb	1653482
chng	1756497
wex	1309108
hun	1307954
fr	921825
pso	938323
st	1477294
nov	1021860
vno	899689
ugi	884614
egp	49600
dseey	1481045
agl	1831097
pltk	1828016
gwre	1528396
ymm	1838413
rga	898174
exel	939767
estc	1707753
hllgy	1674534
ppc	802481
slv	1330568
miufy	1447113
mssmy	1710864
dcp	1338065
voya	1535929
cabo	1632127
wu	1365135
gntx	355811
stwd	1465128
wwd	108312
oukpy	1436786
avlr	1348036
gxo	1852244
cold	1455863
mp	1801368
dnb	1799208
byd	906553
upst	1647639
trex	1069878
uaa	1336917
zim	1654126
lscc	855658
yndx	1513845
ehc	785161
bhc	885590
bfam	1437578
dlo	1846832
plnt	1637207
kbr	1357615
qs	1811414
dooo	1748797
pdce	77877
ori	74260
gmed	1237831
gpk	1408075
nyt	71691
kt	892450
nxst	1142417
cohr	21510
rnr	913144
coup	1385867
pen	1321732
hta	1360604
sf	720672
alk	766421
gil	1061894
masi	937556
aemmy	1437776
mksi	1049502
coty	1024305
isday	1224306
iivi	820318
mgp	1656936
alv	1034670
asr	1123452
timb	1826168
faf	1472787
bak	1071438
rcm	1472595
cx	1076378
cdk	1609702
dava	1656081
srpt	873303
legn	1801198
gds	1526125
vac	1524358
stag	1479094
penn	921738
site	1650729
eeft	1029199
nvst	1757073
iot	1642896
nfg	70145
mfa	1055160
osk	775158
bpop	763901
gh	1576280
smar	1366561
unm	5513
cybr	1598110
fcnca	798941
crcby	1553915
xpo	1166003
oled	1005284
kgc	701818
fybr	20520
tndm	1438133
caci	16058
reyn	1786431
pton	1639825
pb	1068851
wcc	929008
skx	1065837
syna	817720
snv	18349
gtls	892553
itt	216228
bepc	1791863
bld	1633931
pega	1013857
dkng	1772757
edr	1766363
dci	29644
omf	1584207
bhvn	1689813
tenb	1660280
ayi	1144215
lite	1633978
ohi	888491
ksryy	1668501
achc	1520697
sbs	1170858
dds	28917
sail	1627857
pnfp	1115055
ryn	52827
axta	1616862
tdoc	1477449
son	91767
musa	1573516
bc	14930
insp	1609550
uwmc	1783398
txrh	1289460
pii	931015
hli	1302215
rba	1046102
ash	1674862
asgn	890564
agnc	1423689
fsk	1422183
smg	825542
bokf	875357
mndy	1845338
lfus	889331
shc	1822479
lpx	60519
tnet	937098
ffin	36029
lstr	853816
mtdr	1520006
mur	717423
nvt	1720635
twks	1866550
irt	1466085
halo	1159036
bkgfy	1447137
cr	25445
tixt	1825155
msp	1724570
adt	1703056
ingr	1046257
lysdy	1444327
txg	1770787
slab	1038074
tol	794170
hog	793952
eme	105634
ccoey	1551467
hgv	1674168
cccs	1818201
infa	1868778
orcc	1655888
bncdy	1667075
cw	26324
swav	1642545
azta	933974
tmx	1428875
trq	1158041
ubsfy	1446702
ntnx	1618732
rpd	1560327
flo	1128928
tmbby	1531740
saia	1177702
shlx	1610466
gdrx	1809519
clh	822818
sid	1049659
nep	1603145
jsgry	1442656
fsv	1637810
ions	874015
mtz	15615
ssb	764038
vvv	1674910
qlys	1107843
tpx	1206264
colm	1050797
cc	1627223
vips	1529192
wb	1595761
hhc	1498828
hqy	1428336
fcn	887936
vmi	102729
mndt	1370880
mime	1644675
amg	1004434
ipgp	1111928
seas	1564902
lhcg	1303313
cuz	25232
mq	1522540
src	1308606
swx	1692115
tsem	928876
dsgx	1050140
dtm	1842022
eva	1592057
jhg	1274173
pvh	78239
we	1813756
mdu	67716
rli	84246
asan	1477720
thg	944695
asnd	1612042
trno	1476150
ida	1057877
tv	912892
pri	1475922
gbci	868671
psb	866368
paas	771992
ccmp	1102934
iart	917520
dei	1364250
opch	1014739
rhp	1040829
rog	84748
bipc	1788348
chffy	1601994
esi	1590714
auy	1264089
anat	1801075
ozk	1569650
knsl	1669162
stn	1131383
aqua	1604643
sofi	1818874
vg	1272830
exp	918646
woof	1826470
unvr	1494319
wtfc	1015328
sigi	230557
slfpy	1370418
bxmt	1061630
powi	833640
phys	1477049
cig	1157557
hele	916789
slm	1032033
medp	1668397
man	871763
rare	1515673
wk	1445305
slgn	849869
ntco	1776967
vly	714310
cade	1299939
cmc	22444
roll	1324948
expo	851520
tgna	39899
pags	1712807
iaa	1745041
nrz	1556593
futu	1754581
hp	46765
gps	39911
civi	1509589
ufpi	912767
nsa	1618563
am	1623925
leg	58492
axs	1214816
enlc	1592000
tnl	1361658
sam	949870
ihcpf	1508633
krg	1286043
irdm	1418819
mbt	1115837
frsh	1544522
amkr	1047127
drvn	1804745
vrt	1674101
algm	866291
seb	88121
saic	1571123
alks	1520262
bmbl	1830043
adc	917251
lpl	1290109
mxchy	1435969
vrns	1361113
hbi	1359841
cigi	913353
bwxt	1486957
novt	1076930
msa	66570
dna	1830214
osh	1564406
grp-un	1564538
pk	1617406
bkh	1130464
ubsi	729986
igt	1619762
open	1801169
aur	1828108
shi	908732
ambp	1845097
ncr	70866
hxl	717605
ssd	920371
vlpny	1378984
post	1530950
slg	1040971
sgry	1638833
aval	1504764
hrb	12659
al	1487712
wix	1576789
four	1794669
msm	1003078
wwe	1091907
bxsl	1736035
wbs	801337
cere	1805387
esnt	1448893
owl	1823945
mms	1032220
nati	935494
exls	1297989
docn	1582961
icui	883984
run	1469367
srcl	861878
avnt	1122976
tkr	98362
tdc	816761
crus	772406
prgo	1585364
yeti	1670592
tho	730263
box	1372612
lnth	1521036
he	354707
atkr	1666138
arwr	879407
mituy	1446420
ayx	1689923
lazr	1758057
pycr	1839439
ssrm	921638
esgr	1363829
ogs	1587732
btg	1429937
mcw	1853513
sfbs	1430723
umbf	101382
spr	1364885
nycb	910073
pinc	1577916
ensg	1125376
avt	8858
abg	1144980
ftch	1740915
altr	1701732
vsco	1856437
chpt	1777393
apg	1796209
spsc	1092699
vnt	1786842
wts	795403
amn	1142750
sndr	1692063
chx	1723089
zd	1084048
wen	30697
env	1337619
stvn	1849853
fls	30625
adrzy	1436467
evr	1360901
atus	1702780
mtg	876437
ora	1296445
jwn	72333
azihy	1533475
sim	887153
coke	317540
safm	812128
becn	1124941
qdel	353569
itci	1567514
hr	899749
cnx	1070412
mgy	1698990
apls	1492422
sm	893538
atc	1762459
ocdx	1828443
hiw	921082
bhf	1685040
evo	1412558
crox	1334036
por	784977
newr	1448056
awi	7431
lanc	57515
amed	896262
ely	837465
tfsl	1381668
trtn	1660734
is	1837430
pacw	1102112
curlf	1756770
livn	1639691
jobs	1295484
njr	356309
mstr	1050446
fizz	69891
hwc	750577
ryan	1849253
nsp	1000753
celh	1341766
nvax	1000694
jxn	1822993
asai	1834048
zlab	1704292
frpt	1611647
mrvi	1823239
cpg	1545851
alit	1809104
nari	1531048
crk	23194
knbe	1664998
psth	1811882
aple	1418121
crsp	1674416
cwk	1628369
cef	1726122
cwst	911177
wd	1497770
peco	1476204
pnm	1108426
alsn	1411207
glpg	1421876
smtc	88941
ab	825313
dbrg	1679688
bcpc	9326
ago	1273813
carg	1494259
cnmd	816956
bl	1666134
hayw	1834622
val	314808
ait	109563
kex	56047
mxl	1288469
rdn	890926
sig	832988
meoh	886977
smpl	1702744
bzzuy	1437774
srad	1836470
lope	1434588
msgs	1636519
pegry	1455633
dnp	806628
sji	91928
ntla	1652130
epr	1045450
cnm	1856525
tcn	1584425
jbt	1433660
r	85961
wns	1356570
gtes	1718512
doc	1574540
psn	275880
act	1823529
irtc	1388658
sr	1126956
hri	1364479
cbt	16040
ncno	1902733
pch	1338749
cns	1284812
sauhy	1451279
zws	1439288
gt	42582
fnb	37808
brze	1676238
out	1579877
jamf	1721947
matx	3453
nea	1195737
mtsi	1493594
umpq	1077771
oaofy	1058255
fcfs	840489
si	1312109
athm	1527636
fn	1408710
indb	776901
sitm	1451809
dufry	1546354
gatx	40211
appf	1433195
lesl	1821806
chgg	1364954
cri	1060822
bcucy	1581285
sxt	310142
jblu	1158463
appn	1441683
foxf	1424929
homb	1331520
abcm	1492074
cxm	1569345
onto	704532
pgny	1551306
ihs	1876183
mrtx	1576263
ntra	1604821
vrnt	1166388
mmsi	856982
neu	1282637
pbf	1534504
sun	1552275
ebc	1810546
lxp	910108
pten	889900
trip	1526520
flr	1124198
dv	1819928
glbe	1835963
irdey	1530256
laz	1311370
ful	39368
ael	1039828
ttec	1013880
nsit	932696
shoo	913241
spt	1517375
hpp	1482512
viav	912093
iipr	1677576
bpmc	1597264
lthm	1742924
ati	1018963
spb	109177
hasi	1561894
diod	29002
cwen	1567683
esmt	1863105
bku	1504008
sabr	1597033
duol	1562088
azek	1782754
sfm	1575515
cbu	723188
etrn	1747009
cvt	1827075
kfy	56679
jbgs	1689796
wbt	1650962
rezi	1740332
cytk	1061983
prft	1085869
sum	1621563
tmhc	1562476
aso	1817358
lspd	1823306
rklb	1819994
pslv	1494728
pzza	901491
ay	1601072
krtx	1771917
coop	933136
bb	1070235
pcrx	1396814
mant	892537
fele	38725
flyw	1580560
krnt	1625791
bsm	1621434
adnt	1670541
sitc	894315
nomd	1651717
be	1664703
virt	1592386
cwan	1866368
six	701374
aciw	935036
bnl	1424182
joby	1819848
gpi	1031203
den	945764
mrcy	1049521
ajrd	40888
rlx	1828365
cvac	1809122
ucbi	857855
rvlv	1746618
crc	1609253
go	1771515
peb	1474098
abm	771497
olli	1639300
fti	1681459
unf	717954
wtm	776867
yy	1530238
rnw	1848763
cvbf	354647
vet	1293135
eye	1710155
eqc	803649
mth	833079
hgty	1840776
caty	861842
apps	317788
amba	1280263
golf	1672013
xrx	1770450
dorm	868780
hain	910406
acad	1070494
taipy	1716957
dbc	1328237
mli	89439
ale	66756
mc	1596967
alrm	1459200
vsbc	1697884
form	1039399
erf	1126874
kw	1408100
kos	1509991
nni	1258602
atco	1794846
fhb	36377
ifs	1615903
regi	1463258
lac	1440972
pwsc	1835681
dnli	1714899
cpa	1345105
cnr	883902
joe	745308
blkb	1280058
twnk	1644406
nwe	73088
gtbif	1795139
cert	1827090
stne	1745431
fsr	1720990
fun	811532
ken	1611005
fix	1035983
lbrt	1694028
qtwo	1410384
hi	1417398
aatp	1713210
asb	7789
tkc	1071321
boh	46195
kmpr	860748
hlf	1180262
bcc	1328581
sky	90896
cpe	928022
fl	850209
cno	1224608
kwr	81362
abcb	351569
ibtx	1564618
ppbi	1028918
nad	1083839
dq	1477641
sblk	1386716
agi	1178819
lgf-a	929351
arvn	1655759
sem	1320414
klic	56978
sqsp	1496963
sono	1314727
nvg	1090116
ofc	860546
pdco	891024
psec	1287032
whd	1699136
ghc	104889
spwr	867773
upwk	1627475
vc	1111335
iq	1722608
mpln	1793229
aeis	927003
lz	1286139
gef	43920
sg	1477815
kbh	795266
unit	1620280
neog	711377
ccoi	1158324
awr	1056903
sfrgy	1571549
staa	718937
pfsi	1745916
evtc	1559865
bco	78890
nkla	1731289
fbp	1057706
fate	1434316
tac	1144800
nvmi	1109345
rusha	1012019
frhc	924805
sstk	1549346
eprt	1728951
furcf	1559444
lth	1869198
aat	1500217
mcy	64996
ava	104918
delky	1361371
boot	1610250
wll	1255474
algt	1362468
btegf	1279495
jjsf	785956
task	1829864
hl	719413
nuva	1142596
rmbs	917273
ens	1289308
rrr	1653653
simo	1329394
mgee	1161728
wrby	1504776
cvlt	1169561
omab	1378239
trup	1371285
crvl	874866
mlco	1381640
sfnc	90498
vsat	797721
vsh	103730
albky	902102
beam	1745999
vicr	751978
iijiy	1090633
cbrl	1067294
btu	1064728
vir	1706431
pbh	1295947
main	1396440
amr	1704715
mmyt	1495153
crct	1828962
abr	1253986
ugp	1094972
wing	1636222
ftdr	1727263
exg	1379438
arnc	1790982
mdc	773141
banf	760498
inst	1841804
cour	1651562
uilcy	1449580
cwt	1035201
omi	75252
fhi	1056288
fwrd	912728
trox	1530804
rlay	1812364
nex	1688476
tcbi	1077428
sho	1295810
brp	1781755
sbra	1492298
amrc	1488139
mog-a	67887
agti	1749704
insm	1104506
mac	912242
trn	99780
bpxxy	1567024
zip	1617553
wern	793074
axnx	1603756
figs	1846576
calx	1406666
hlne	1433642
hrmy	1802665
sanm	897723
roiv	1635088
focs	1651052
tcnnf	1754195
hpk	1792849
calm	16160
fa	1210677
aeo	919012
wsfs	828944
cgau	1854640
cixx	1829948
ipar	822663
aca	1739445
aub	883948
hae	313143
ag	1308648
aaon	824142
jteky	1446661
oas	1486159
lfst	1845257
webr	1857951
kd	1867072
ster	1645070
ggal	1114700
ssu	1869858
iova	1425205
lcii	763744
iboc	315709
navi	1593538
epay	1073349
evh	1628908
hmy	1023514
ptct	1070081
nmrk	1690680
cvi	1376139
pd	1568100
aimc	1374535
gbdc	1476765
cgc	1737927
cort	1088856
ain	819793
mtor	1113256
unfi	1020859
eqrx	1843762
onb	707179
hubg	940942
gogl	1029145
wdfc	105132
usm	821130
itgr	1114483
bldp	1453015
ozon	1822829
dsey	1831617
dy	67215
psmt	1041803
utf	1275617
dh	1861795
atrc	1323885
msge	1795250
bowl	1840572
mdrx	1124804
tlry	1731348
arch	1037676
fult	700564
evcm	1853145
lfg	1823766
etwo	1800347
prva	1759655
ottr	1466593
bros	1866581
ibp	1580905
rig	1451505
glng	1207179
sgfy	1828182
embk	1827980
safe	1688852
yelp	1345016
tex	97216
jks	1481513
eaf	931148
csq	1275214
cim	1409493
urbn	912615
maxr	1121142
goos	1690511
negg	1474627
ccu	888746
ptxky	1545057
bynd	1655210
tal	1499620
hth	1265131
wor	108516
wire	850460
lgih	1580670
ihrt	1400891
mlkn	66382
brc	746598
ngvt	1653477
esba	1553079
teo	932470
iosp	1054905
mnso	1815846
bmi	9092
bvn	1013131
shak	1620533
atsg	894081
ktb	1760965
nhi	877860
angi	1705110
you	1856314
tell	61398
ntct	1078075
cstm	1563411
save	1498710
plxs	785786
scl	94049
mntv	1739936
prmw	884713
gcp	1644440
shmay	1555379
bdc	913142
ailih	18654
tph	1561680
rlj	1511337
ulcc	1670076
vorb	1843388
thrm	903129
cmtg	1666291
eurn	1604481
ax	1299709
manu	1549107
colb	887343
abcl	1703057
cd	1807192
tr	98677
iba	1044896
tsp	1823593
slcjy	1523541
nxe	1698535
napa	1835256
odp	800240
gkos	1192448
yumm	1073748
dnut	1857154
hlio	1024795
qfin	1741530

## Sheet: Sheet2
cent	887733
wfrd	1603923
play	1525769
cvco	278166
vnom	1602065
arlp	1086600
orryy	1641431
ping	1679826
itri	780571
dct	1160951
atgsy	1437541
pax	1825570
swtx	1773427
roic	1407623
res	742278
nus	1021561
drh	1298946
gshd	1726978
vrrm	1682745
comp	1563190
dkl	1552797
nvro	1444380
kmt	55242
hcm	1648257
tigo	912958
zgn	1877787
otly	1843586
kai	886346
zeta	1851003
pagp	1581990
apam	1517302
smci	1375365
verx	1806837
cdev	1658566
hlmn	1822492
thnpy	1792045
wmk	105418
xhr	1616000
rxt	1810019
cpk	19745
utg	1263994
ramp	733269
ue	1611547
dan	26780
brfs	1122491
lkncy	1767582
pipr	1230245
mtx	891014
eqx	1756607
prgs	876167
oi	812074
ameh	1083446
lila	1712184
fibk	860413
frme	712534
tds	1051512
expi	1495932
clbk	1723596
avav	1368622
psfe	1833835
fss	277509
frog	1800667
gms	1600438
ivt	1307748
ftai	1590364
cbz	944148
vsto	1616318
wsbc	203596
nxrt	1620393
gbt	1629137
gsat	1366868
vrtv	1599489
skin	1818093
fvrr	1762301
blmn	1546417
fcpt	1650132
pgre	1605607
laur	912766
cake	887596
cnne	1704720
spce	1706946
anf	1018840
epc	1096752
gogo	1537054
med	910329
erj	1355444
gdv	1260729
ng	1173420
nova	1772695
wre	104894
or	1627272
ttgt	1293282
sats	1415404
pay	1841156
acva	1637873
swi	1739942
ltghy	1569963
mgpi	835011
mgrc	752714
wafd	936528
vgr	59440
cmp	1227654
csgs	1005757
cvet	1752836
enr	1632790
irwd	1446847
slvm	1856485
fhai	1309251
rqi	1157842
spxc	88205
bmez	1785971
pdm	1042776
bdn	790816
bcnay	1445168
sbcf	730708
inmd	1742692
itcb	1276671
fold	1178879
ffbc	708955
fsly	1517413
aaww	1135185
tdcx	1803112
ety	1340736
gpor	874499
utz	1739566
asz	1839191
cyxt	1794905
wbx	1866501
prk	805676
sage	1597553
htgc	1280784
rely	1782170
cnk	1385280
arcb	894405
ias	1842718
ktos	1069258
opk	944809
fbc	1033012
lxu	60714
bstz	1768666
nog	1104485
mwa	1350593
ai	1577526
vctr	1570827
bbu	1654795
nuv	812801
tgsgy	1437731
gnw	1276520
lob	1462120
gsbd	1572694
ampl	1866692
dada	1793862
nzf	1137887
evt	1253327
door	893691
adx	2230
npo	1164863
icfi	1362004
sdgr	1490978
htlf	920112
fbk	1649749
alhc	1832466
bur	1714174
tse	1519061
enic	1659939
ne	1458891
lkfn	721994
acls	1113232
banr	946673
ccs	1576940
wgo	107687
praa	1185348
crs	17843
itpof	880224
hep	1283140
sah	1043509
nabl	1834488
dk	1694426
bpiry	1437441
law	1625641
ceqp	1136352
vtkly	913744
vlrs	1520504
ebs	1367644
nvee	1532961
sbh	1368458
impjy	1437538
gab	794685
sasr	824410
akr	899629
evbg	1437352
imkta	50493
kind	1846069
sbgi	912752
cosg	1706509
dniyy	1487739
lpro	1806201
dwac	1849635
fhtf	1764443
esta	1688757
rcus	1724521
mmi	1578732
gtn	43196
tbk	1539638
kro	1257640
idcc	1405495
eat	703351
vmeo	1837686
kar	1395942
trmk	36146
ptve	1527508
sjw	766829
jeld	1674335
ths	1320695
nac	1074952
mtrn	1104657
hope	1128361
bcat	1809541
jack	807882
qrtea	1355096
forg	1543916
om	1484612
ego	918608
kn	1587523
ccyc	1681769
hcc	1691303
wow	1701051
bdj	1332283
olk	1835539
ande	821026
cdna	1217234
mara	1507605
cmre	1503584
cint	1868995
tblt	1668370
bcrx	882796
efsc	1025835
ecpg	1084961
dac	1369241
lpsn	1102993
kahc	1843212
mygn	899923
xmtr	1657573
cvii	1828248
rcii	933036
pfs	1178970
poly	914025
ako-a	925261
amph	1297184
ahco	1725255
rnst	715072
kymr	1815442
b	9984
gpre	1309402
flgt	1674930
www	110471
mntk	1826600
two	1465740
infn	1138639
tgh	1413159
fro	913290
usac	1522727
adldy	1641427
csiq	1375877
dfh	1825088
bgs	1278027
olo	1431695
cswi	1624794
adv	1776661
xper	1803696
ari	1467760
lrn	1157408
hbm	1322422
hmn	850141
air	1750
vbtx	1501570
mei	65270
stra	1013934
md	893949
pty	1190935
skt	899715
ns	1110805
mir	1809987
arhs	1875444
isee	1410939
pjt	1626115
ntb	1653242
ese	866706
baly	1747079
evri	1318568
cioxy	1483379
ypf	904851
tptx	1595893
vcsa	1874944
vrnof	1848416
avdx	1858257
himx	1342338
egbn	1050441
pdi	1510599
ctos	1709682
prct	1588978
vtscy	1880866
xpro	1575828
lgnd	886163
sncy	1743907
nmih	1547903
tvty	704415
ceix	1710366
dea	1622194
mcg	1846510
zuo	1423774
bke	885245
prm	1880319
nwbi	1471265
wabc	311094
step	1796022
rvt	804116
tslx	1508655
krys	1711279
sgml	1848309
ibrx	1326110
uan	1425292
oscr	1568651
ctre	1590717
prg	1808834
tvtx	1438533
mnro	876427
fcel	886128
lc	1409970
jps	1176433
mfgp	1359711
ostk	1130713
rvmd	1628171
twst	1581280
cxw	1070985
usa	799195
hni	48287
frg	1528930
btt	1528437
evtl	1867102
nbtb	790359
kalu	811596
supn	1356576
mvst	1760689
sovo	1856608
vcyt	1384101
inta	1565687
crto	1576427
nnmx	1473579
patk	76605
gcmg	1819796
swim	1833197
ty	99614
xncr	1326732
alex	1545654
oxm	75288
plya	1692412
etv	1322436
ddd	910638
payo	1845815
flng	1772253
ionq	1824920
argo	1091748
ecol	1783400
pacb	1299130
inbt	1657803
gdot	1386278
plus	1022408
udmy	1607939
pdo	1798618
imcr	1671927
kfrc	930420
stng	1483934
ges	912463
ubeoy	1446626
gsg	1332174
alg	897077
xene	1582313
arco	1508478
msex	66004
taro	906338
usna	896264
tuya	1829118
esrt	1541401
talo	1724965
int	789460
lnn	836157
pmt	1464423
sana	1770121
mrtn	799167
aac	1829432
atge	730464
ipof	1818873
cenx	949157
mttr	1819394
pump	1680247
vzio	1835591
crsr	1743759
forty	1045986
dcbo	1829959
skyw	793733
ttmi	1116942
bbai	1836981
tgi	1021162
nwn	1733998
jbi	1839839
cldx	744218
onem	1404123
ahl-pc	1267395
modv	1220754
px	1841968
celu	1752828
semr	1831840
prta	1559053
irbt	1159167
biogy	1572957
sbfm	1402328
gden	1071255
uctt	1275014
avid	896841
codi	1345126
mag	1230992
vre	924901
me	1804591
amk	1591587
domo	1505952
chef	1517175
bxmx	1298699
sybt	835324
osis	1039065
gnl	1526113
vcel	887359
plmr	1761312
avns	1606498
uvv	102037
amcx	1514991
auph	1600620
valn	1836564
ptra	1820630
fna	1531978
silk	1397702
afya	1771007
hrt	1859285
azul	1432364
bamr	1837429
sa	1231346
gva	861459
ptnr	1096691
ladr	1577670
enva	1529864
sfl	1289877
stc	94344
ryi	1481582
ssp	832428
ten	1024725
gpro	1500435
ecvt	1708035
lmnd	1691421
cubi	1488813
bbby	886158
dsl	1566388
wrmk	1609471
meg	1643615
etg	1270523
sldp	1844862
cmpr	1262976
vrts	883237
snex	913760
adus	1468328
ofg	1030469
gbx	923120
giii	821002
rdwr	1094366
wkme	1847584
road	1718227
mgni	1595974
loma	1711375
gel	1022321
slca	1524741
mcri	907242
cls	1030894
mho	799292
cffn	1490906
fbnc	811589
mlnk	1834494
rily	1464790
aroc	1389050
rlgy	1398987
cohu	21535
bigc	1626450
exai	1865408
iag	1203464
bgcp	1094831
clov	1801170
pcvx	1649094
sand	1434614
ssys	1517396
pra	1127703
arvl	1835059
cash	907471
crncy	909531
pl	1836833
svc	945394
lyel	1806952
usph	885978
cnxn	1050377
wrld	108385
enta	1177648
nxgn	708818
myrg	700923
bv	1734713
camt	1109138
kros	1664710
ccxi	1340652
pi	1114995
envx	1828318
fcf	712537
bst	1616678
clne	1368265
saft	1172052
extr	1078271
din	49754
scs	1050825
ltc	887905
apgt	1353538
ctkb	1831915
rock	912562
pro	1392972
allo	1737287
comm	1517228
rvnc	1479290
agro	1499505
riot	1167419
spns	885740
dcom	846617
nmfc	1496099
jwsm	1831359
ddl	1854545
asix	1673985
schl	866729
ocsl	1414932
axsm	1579428
sbsi	705432
pack	1712463
agio	1439222
opad	1825024
nvta	1501134
wetg	1784970
rdfn	1382821
elf	1600033
gff	50725
csr	798359
nwbo	1072379
ffwm	1413837
get	1867325
buse	314489
xpel	1767258
hcsg	731012
gdev	1848739
tbbk	1295401
nexa	1713930
alx	3499
exfy	1476840
hees	1339605
evv	1222922
hlly	1822928
prim	1361538
hyt	1222401
rpay	1720592
ssdt	1673504
schn	912603
slgc	1837412
nfj	1260563
trs	842633
land	1495240
pubm	1422930
zntl	1725160
lwlg	1325964
phr	1412408
epac	6955
rgr	95029
mdgl	1157601
ero	1853860
bbio	1743881
nymt	1273685
prlb	1443669
morf	1679363
rgnx	1590877
nbr	1163739
fdp	1047340
crlbf	1832928
gsm	1639877
adpt	1478320
czoo	1859639
bhlb	1108134
bfs	907254
neo	1077183
lpi	1528129
cwh	1669779
sptn	877422
clm	814083
dnow	1599617
fpf	1567569
aledy	1508668
hska	1038133
chco	726854
acel	1698991
crnc	1768267
lzb	57131
nmz	1266585
star	1095651
gty	1052752
cdlx	1666071
arko	1823794
clb	1000229
lev	1834974
tnc	97134
veco	103145
eoss	1651958
alkt	1529274
aosl	1387467
scgey	1449267
cndt	1677703
mnrl	1745797
gic	945114
taqr	1656053
cron	1656472
goev	1750153
bbn	1493683
sxi	310354
ncbs	1174850
cyrx	1124524
uuuu	1385849
atri	701288
pam	1469395
cbd	1038572
shls	1831651
kref	1631596
dlx	27996
vadp	1700849
cts	26058
dole	1857475
tcbk	356171
bkd	1332349
wish	1822250
rnp	1224450
clmt	1340122
inva	1080014
mlab	724004
oflx	1317945
aten	1580808
banc	1169770
ntus	878526
hurn	1289848
kyn	1293613
vivo	794172
vvnt	1713952
brkl	1049782
brfh	1487197
uec	1334933
imos	1123134
dm	1754820
stba	719220
umh	752642
sapmy	1062750
apog	6845
veon	1468091
nbhc	1475841
ocfc	1004702
azz	8947
lmdx	1685428
pta	1793882
imgn	855654
noah	1499543
cco	1334978
rxrx	1601830
tgls	1534675
sfix	1576942
oii	73756
dvax	1029142
tree	1434621
rwt	930236
atax	1059142
arce	1740594
radi	1810739
gol	1291733
frey	1844224
amrs	1365916
user	1557127
sii	1512920
sumo	1643269
rpt	842183
eig	1379041
stem	1758766
aagh	1098009
btrs	1774155
rfp	1393066
bchpy	1887388
agm	845877
tmp	1005817
silv	1659520
rovr	1826018
krp	1657788
momo	1610601
htld	799233
cnob	712771
qqqx	1608741
eght	1023731
ggpi	1847127
atec	1350653
tgtx	1001316
brsp	1717547
cutr	1162461
amrn	897448
licy	1828811
prpb	1812667
bhg	1671284
tbla	1840502
imab	1778016
drq	1042893
eb	1475115
ccsi	1866633
mytay	1047564
rc	1527590
btz	1379384
pgti	1354327
achr	1824502
hipo	1828105
hera	1842912
mbuu	1590976
rxdx	1718852
finv	1691445
kamn	54381
nhc	1047335
srce	34782
erii	1421517
rdnt	790526
dbi	1319947
cpuh	1828608
arqt	1787306
forr	1023313
nuvb	1811063
kbsr	1482430
sph	1005210
pll	1728205
insw	1679049
gaxy	1127993
evop	1704596
astl	1860805
tmci	1630627
myte	1831907
brmk	1784797
blnd	1855747
inn	1497645
nfgc	1840616
caap	1717393
ngm	1426332
crhc	1818212
grbk	1373670
hlth	1628945
cmco	1005229
merc	1333274
ra	1655099
apsg	1820872
orla	1680056
dnn	1063259
huya	1728190
ipi	1421461
ilpt	1717307
bcor	1068875
tsc	1380846
cet	18748
nvgs	1581804
opi	1456772
gof	1380936
clbt	1854587
pfbc	1492165
mcb	1476034
dfin	1669811
kura	1422143
fsm	1341335
cano	1800682
vtex	1793663
sndl	1766600
big	768835
bkuh	1440153
pfc	946647
etw	1322435
itos	1808865
amtb	1734342
hyzn	1716583
hesm	1789832
bcsf	1655050
pbfx	1582568
reta	1358762
lilm	1855756
shcr	1816233
edit	1650664
igr	1268884
mrc	1439095
arry	1820721
til	1789769
kc	1795589
aus	1838207
rtsl	1575659
arqq	1859690
imax	921582
mtls	1091223
nrk	1195739
snbr	827187
pct	1830033
eras	1761918
atex	1304492
crnx	1658247
chy	1222719
indi	1841925
gprk	1464591
posh	1825480
lmat	1158895
matw	63296
atrs	1016169
sli	1537137
zuus	1687926
modn	1118417
gco	18498
aiv	922864
ngd	800166
orgn	1802457
eos	1308335
gdyn	1743725
cyh	1108109
bcx	1506289
holi	1357450
slp	1023459
scwx	1468666
smp	93389
ebix	814549
smwb	1842731
spnt	1576018
dao	1781753
mqy	890196
smrt	1837014
oec	1609804
gam	40417
par	708821
wlkp	1604665
shen	354963
zh	1835724
osw	1758488
peri	1338940
tgs	931427
snpo	1856430
dht	1331284
karo	1828102
plab	810136
nlst	1282631
sndx	1395937
mgi	1273931
gmre	1533615
xent	1271214
dmlp	1172358
yduqy	1519821
lung	1127537
agys	78749
aod	1379400
myov	1679082
ewcz	1856236
cde	215466
blu	1259942
kids	1425450
hqh	805267
adct	1771910
gnk	1326200
cdxs	1200375
efc	1411342
sklz	1801661
shyf	743238
hzo	1057060
aste	792987
max	1818383
tbi	768899
amsf	1018979
uis	746838
ldi	1831631
tmst	1598428
mrus	1651311
vnet	1508475
bma	1347426
tclry	1080259
gldd	1372020
nmm	1415921
thry	1556739
vhi	59255
bmdpf	1002788
glp	1323468
gb	1799983
chct	1631569
amps	1828723
sbr	710752
avpt	1777921
cal	14707
trmr	1849396
pdfs	1120914
bsig	1748824
avo	1802974
mtl	1302362
parr	821483
fgen	921299
obnk	1516912
scvl	895447
nstg	1401708
pbi	78814
krny	1617242
thq	1604522
chi	1171471
splp	1452857
by	1702750
jrvr	1620459
jbss	880117
hims	1773751
enfn	1868912
rskd	1851112
hlit	851310
cdmo	704562
nrc	70487
cdre	1860543
brog	1774983
hcat	1636422
awf	906013
kdny	1435049
htd	1260041
bry	1705873
zumz	1318008
ha	1172222
hfwa	1046025
twi	899751
cresy	1034957
fnma	310522
mx	1325702
proc	1863362
ac	1642122
adtn	926282
cii	1278895
amwl	1393584
tup	1008654
trssf	1778129
orgo	1661181
vaxx	1851657
scsc	918965
mov	72573
qtrx	1503274
vtol	1525221
lgsxy	1447221
egle	1322439
hfro	1710680
ffie	1805521
amrk	1591588
nvts	1821769
pntm	1830392
abtx	1642081
apgb	1838337
ceva	1173489
rbcaa	921557
mgic	876779
clar	913277
lgv	1832300
denn	852772
iiin	764401
hmst	1518715
ichr	1652535
lidr	1818644
pds	1013605
astr	1814329
qcrh	906465
bhe	863436
ntst	1798100
wttr	1693256
sava	1069530
api	1802883
nktr	906709
brbr	1772016
grc	42682
tdw	98222
cers	1020214
mnkd	899460
dice	1645569
ffc	1174164
geo	923796
srra	1290149
veru	863894
gwh	1819438
wetf	880631
wash	737468
blnk	1429764
ango	1275187
avya	1418100
jpc	1216583
gsl	1430725
bird	1653909
for	1406587
hsc	45876
ahh	1569187
trmd	1655891
oxlc	1495222
vtyx	1851194
alec	1653087
alpc	1616736
csii	1180145
trtx	1630472
nptn	1227025
cprx	1369568
pnt	1811764
utl	755001
fxlv	1788717
ccf	830524
plym	1515816
myi	883412
pear	1835567
ainv	1278752
swm	1000623
jqc	1227476
fviv	1828183
amwd	794619
prdo	1046568
fax	790500
seat	1856031
fwrg	1789940
twou	1459417
acrs	1557746
pebo	318300
repl	1737953
revg	1687221
cars	1683606
hwkn	46250
adth	1838672
jout	788329
cifr	1819989
stgw	876883
clfd	796505
mye	69488
crge	1277250
tcpc	1370755
cnta	1847903
base	1845022
eim	1176984
good	1234006
boxd	1828672
gevo	1392380
hbnc	706129
geni	1834489
vrex	1681622
lbai	846901
axl	1062231
yext	1614178
up	1819516
next	1612720
ghrs	1855129
hhr	1721181
gsbc	854560
alp-pq	3153
kelya	55135
nndm	1643303
cchwf	1776738
desp	1703141
lind	1512499
trvg	1683825
ptlo	1871509
huma	1818382
tile	715787
onl	1873923
myps	1823878
fmcb	1085913
imxi	1683695
boac	1818089
tbph	1583107
dly	1788399
phk	1219360
verv	1840574
ubp	1029800
mirm	1759425
vist	1762506
uvsp	102212
eocw	1843862
svfa	1828478
avan	1819608
cgbd	1544206
rada	761238
ufcs	101199
chrs	1512762
mor	1340243
hiii	1823034
skil	1774675
ruth	1324272
biol	811240
jmia	1756708
btwn	1815086
indt	1037390
capl	1538849
brg	1442626
pahc	1069899
plce	1041859
pdt	855886
qure	1590560
aspn	1145986
vivk	1450704
wina	908315
atai	1840904
aeva	1789029
niu	1744781
este	10254
audc	1086434
hone	1769617
wnc	879526
hlgn	1840292
rlmd	1553643
ctbi	350852
vygg	1822877
goac	1816176
nwli	1635984
rbac	1815184
idt	1005731
plow	1287213
lmaca	1831992
th	1712189
sdc	1775625
dcgo	1822359
scoa	1828985
cook	1857853
dffn	1053691
rna	1599901
cbtx	1473844
hckt	1057379
lgac	1836337
msda	1846996
bfly	1804176
slam	1838162
paya	1819881
hafc	1109242
csv	1016281
pmvp	1699382
opra	1737450
renn	1509223
bcyc	1761612
sasdy	1451167
acco	712034
vmo	884152
cpf	701347
mbi	814585
dsgn	1807120
acre	1529377
inbx	1739614
flws	1084869
azre	1633438
slrc	1418076
ww	105319
rckt	1281895
fpac	1829426
atlc	1464343
mhd	1034665
tdup	1484778
fbms	947559
swbi	1092796
valu	717720
lbc	1475348
curv	1792781
bxc	1301787
nrds	1625278
fubo	1484769
boe	1320375
sibn	1459839
bto	925683
pml	1170299
abml	1576873
toi	1799191
sboey	1578955
ccvi	1828250
metc	1687187
uht	798783
mbin	1629019
bjri	1013488
cldt	1476045
cown	1466538
sd	1349436
gsev	1828096
wpcb	1836074
ctv	1835378
avxl	1314052
ipsc	1850119
pcok	1452936
htbk	1053352
sxc	1514705
strl	874238
drd	1023512
safly	1538028
cnsl	1304421
nie	1383441
rocc	77159
osbc	357173
kzr	1645666
acb	1683541
cfb	1458412
vvi	884219
avd	5981
vslax	853180
vinp	1826286
bhil	1830210
hci	1400810
crgy	1866175
lnd	1499849
kvsc	1846068
anab	1370053
cac	750686
fnko	1704711
wiw	1267902
ndmo	1793129
ffic	923139
arr	1428205
can	1780652
dgii	854775
sp	1059262
fpi	1591670
mkfg	1816613
arlo	1736946
aio	1778114
wti	1288403
bhk	1160864
vld	1825079
ccrn	1141103
fmbh	700565
bvs	1665988
faro	917491
aan	1821393
strc	1826681
hbia	732417
bbdc	1379785
chs	897429
nssc	69633
asle	1754170
tngx	1819133
hzon	1821788
hcci	1403431
nx	1423221
knsa	1730430
npacy	1450276
sgmo	1001233
mmx	1773250
bzfd	1828972
nkx	1195738
nfbk	1493225
bw	1630805
eoi	1300391
tigr	1756699
ttcf	1741231
sva	1084201
ntgr	1122904
pfn	1296250
ruprf	1010000
dcph	1654151
vtnr	890447
sens	1616543
nrgx	1756908
eols	1570562
uslm	82020
exk	1277866
hsii	1066605
cvgw	1133470
cio	1593222
evgo	1821159
innv	1834376
ontf	1110611
enmpy	1630511
vvr	1059386
iiiv	1728688
cion	1534254
ino	1055726
cfiv	1825249
qsi	1816431
etd	896156
alcc	1849056
fcuv	1590418
hlx	866829
cstl	1447362
ccd	1602584
atni	879585
igms	1496323
nid	1557915
lca	1844642
hibb	1017480
nktx	1787400
sohu	1734107
hut	1731805
albo	1322505
ldp	1548717
ccv	1812234
hngr	722723
ree	1843588
mit	1826058
tcx	909494
acet	1720580
pcn	1160990
rick	935419
ofix	884624
fsnb	1840225
vwe	1834045
hstm	1095565
atra	1604464
bwmx	1788257
tmdx	1756262
crai	1053706
bbln	1866390
esgc	1532981
stkl	351834
rbot	1812173
acqr	1837393
wdh	1823986
dba	1383082
dx	826675
dco	30305
lasr	1124796
crf	33934
trst	357301
pbt	319654
bnr	1792267
iim	885601
grpn	1490281
rere	1838957
naut	1808805
np	1296435
fthy	1810523
ggn	1313510
bzun	1625414
blde	1779128
nesr	1698514
coco	1482981
mxct	1287098
ciso	1777319
amrx	1723128
ta	1378453
tpb	1290677
mvis	65770
rmgc	1838108
untc	798949
doma	1722438
oust	1816581
etj	1395325
rsvr	1824403
rway	1653384
swir	1111863
fbrt	1562528
invz	1835654
nn	1865631
yala	1794350
emd	1227862
diax	1608742
airs	1870940
bit	1562818
olp	712770
lpg	1596993
wsr	1175535
insd	1697587
bbar	913059
irs	933267
gte	1273441
ipod	1818876
vgm	880892
doyu	1762417
ingn	1294133
petq	1668673
hive	1720424
thw	1635977
vkq	877463
blx	890541
msbi	1466026
nxdt	1356115
band	1514416
pgc	1050743
gci	1579684
nrp	1171486
prtc	1782999
catc	711772
egrx	827871
agcb	1830232
amal	1823608
dawn	1845337
ske	1713748
hyln	1759631
sbow	351817
ospn	1044777
lifx	1581760
vnda	1347178
amswa	713425
mass	1555279
cbl	910612
biox	1769484
heps	1850235
tspq	1838219
phvs	1830487
sgh	1616533
bitf	1812477
revh	1841389
ccap	1633336
gtpb	1842046
agx	100591
vaqc	1842386
imgo	1623715
bgy	1393299
iesc	1048268
newt	1587987
clvly	1290877
ivr	1437071
ocft	1780531
coll	1267565
absi	1672688
glue	1826457
fc	886206
trns	99302
knop	1564180
bgb	1546429
stok	1623526
thff	714562
cmax	1813914
bvh	315858
locl	1840780
ble	1176194
bme	1314966
bgry	1824734
crmt	799850
ulh	1308208
arct	1768224
blfs	834365
prpc	1821329
iqi	885125
goss	1728117
ddi	1799567
fosl	883569
amyt	1783010
bbsi	902791
dske	1642453
rgp	1084765
titn	1409171
real	1573221
dpg	1515671
bfc	1746109
borr	1715497
bark	1819574
avah	1832332
rtlr	1748773
gbl	1060349
kop	1315257
tnk	1419945
cepu	1717161
aawh	1756390
lgo	1400438
vsec	102752
svm	1340677
nrix	1549595
tls	320121
jfr	1276533
qnst	1117297
myd	879361
fsp	1031316
dhil	909108
ytpg	1840859
ellky	1437194
alxo	1810182
smfr	1818331
lqdt	1235468
srdx	924717
body	1826889
imvt	1764013
pv	1818787
hps	1215913
sri	1043337
dgnu	1827076
ccb	1437958
cswc	17313
eqbk	1227500
quot	1115128
fmnb	709337
clw	1441236
tgb	878518
siga	1010086
mcbs	1747068
bfk	1137393
inre	1528985
nbb	1478888
gpmt	1703644
dhc	1075415
seer	1726445
ufpt	914156
anzu	1840877
ghld	1821160
rbbn	1708055
ghy	1554697
cass	708781
phar	1828316
arbe	1861841
nxj	1087786
frph	844059
tbcp	1815753
ctic	891293
orc	1518621
hy	1173514
bmrc	1403475
aura	1501796
dbo	1383058
ob	1454938
lwel	1567098
traq	1841230
grin	1725293
ctaq	1823634
ulnv	1605810
eqd	1818221
fmao	792966
peo	216851
blbd	1589526
snrh	1823854
finm	1823855
hhla	1824185
yorw	108985
brds	1861449
rmni	1635282
oprx	1448431
rex	744187
ohpa	1836129
xpof	1802156
joff	1824149
npk	80172
agac	1833909
endp	1593034
flnc	1868941
gain	1321741
pflt	1504619
maxn	1796898
ml	1807846
sb	1434754
cpac	1221029
chuy	1524931
avir	1593899
ephy	1827248
thr	1489096
pdot	1841845
edn	1395213
arow	717538
mmd	1518557
tcva	1845580
vgii	1841761
fhtx	1822462
vcv	895531
nuvl	1861560
anip	1023024
impx	1820191
srne	850261
newp	1369085
imtx	1809196
pacx	1829797
iren	1878848
tcda	1595585
glt	41719
mvbf	1277902
blw	1233681
zeal	1674988
avk	1219120
mcs	62234
hbt	775215
cool	1829953
ifn	917100
fcax	1823733
agen	1098972
wkhs	1425287
tlga	1827871
nstb	1834518
vitl	1579733
mbwm	1042729
mvf	835948
mbac	1839175
nstc	1835817
nstd	1835814
vray	1597313
aaqc	1838883
hrtx	818033
pnnt	1383414
cang	1725123
curo	1711291
lx	1708259
meso	1345099
muc	1051004
fmcc	1026214
tufn	1757399
mitk	807863
poww	1015383
root	1788882
doug	1878897
gim	828803
rptx	1808158
mtw	61986
ayrwf	1847462
bzh	915840
ltch	1826000
gern	886744
le	799288
fdus	1513363
kpti	1503802
sjt	319655
tpc	77543
awp	1390195
itrn	1337117
crbu	1619856
vxrt	72444
trc	96869
groy	1834026
pntg	1766400
nnox	1795251
icpt	1270073
ngvc	1547459
mmu	886043
cpsi	1169445
xos	1819493
llnw	1391127
tpvg	1580345
tetc	1840920
chw	1396277
naac	1830063
aka	1865107
krus	1772177
jpi	1547994
acam	1846125
tti	844965
brdg	1854401
eh	1759783
prds	1822711
nlcp	1854964
hpi	1176199
bui	1528988
cem	1488775
ogi	1620737
mui	1232860
ocgn	1372299
afmd	1608390
dsu	1051003
fcbc	859070
conn	1223389
mgnx	1125345
cara	1346830
cgnt	1824814
ptgx	1377121
lhc	1824153
hayn	858655
pzn	1399249
mua	901243
mgtx	1735438
stk	1471420
isd	1534880
hvt	216085
rmax	1581091
upld	1505155
cgem	1789972
igd	1285890
mcrb	1609809
ke	1606757
dmrc	1438231
snce	1819113
osur	1116463
cfvi	1830081
nsr	813639
pets	1040130
cccc	1662579
bfst	1624322
leap	1818346
mcft	1638290
mofg	1412665
evc	1109116
ecc	1604174
senea	88948
cnfn	1352952
nat	1000177
ead	1210123
higa	1823776
owlt	1816708
rmr	1644378
accd	1481646
rei	1384195
rapt	1673772
cstr	1676479
onew	1772921
evn	1074540
jynt	1612630
ebf	33002
nqp	870780
trin	1786108
ccbg	726601
lxfr	1096056
gut	1080720
bwb	1341317
ghg	1724755
dfp	1559991
mdxg	1376339
fisi	862831
iea	1652362
etb	1308927
phat	1783183
htbi	1538263
sify	1094324
vsta	1792829
casa	1333835
gtx	1735707
gcbc	1070524
srlp	1525287
enpc	1816261
repx	1001614
legh	1436208
joan	1834585
ficv	1855693
nvcn	1399708
ff	1337298
arta	1844840
ever	1640428
gotu	1768259
dsx	1318885
spwh	1132105
pcpc	1824993
cpar	1848410
hyfm	1695295
dyn	1818794
rm	1519401
ecom	1169652
dxpe	1020710
ll	1396033
cmbm	1738177
cpaa	1841137
twlv	1819498
fsbc	1275168
tpgy	1819399
icnc	1858351
ndac	1837067
pspc	1843716
spfi	1163668
aerg	879911
sbnc	703904
artna	863110
tpic	1455684
janx	1817713
cndb	1851961
alrs	903419
vera	1831828
wuyi	1687065
dgica	800457
frxb	1840161
giix	1841080
srg	1628063
wald	1840199
ccne	736772
fra	1259708
ffntf	1783875
leo	818972
care	1829576
enob	1527728
scle	1838697
cyd	932695
bh	1726173
glbl	1838615
ibcp	39311
myn	882150
jcic	1822312
slcr	1826553
rngtf	1431852
scob	1838431
gsqd	1837207
rsi	1793659
gfx	1823896
oepw	1824677
mod	67347
rbb	1499422
hcic	1829455
dhhc	1830188
ross	1841610
rxra	1840463
twni	1835881
fact	1838987
acii	1838614
macc	1840148
tioa	1846163
slac	1834755
spgs	1839127
lega	1834628
coli	1829615
acah	1836274
ptoc	1838238
fsd	1494530
gate	1838513
sgu	1002590
vpg	1487952
fmiv	1842916
irmd	1325618
kodk	31235
rigl	1034842
ztr	836412
zt	1849408
trtl	1847112
gilt	897322
acro	1847891
dnmr	1779020
rmt	912147
dlth	1649744
mpb	879635
nfys	1850502
vec	1601548
twnd	1814215
litt	1848364
tdf	919893
gnty	1058867
ebtc	1018399
fph	1574197
flic	740663
bcsa	1873441
vki	908993
tipt	1393726
wulf	1083301
smbk	1038773
ewtx	1710072
nyxh	1857190
wtba	1166928
dtoc	1839998
opy	791963
tcs	1411688
eypt	1314102
hcar	1824846
alto	778164
cmps	1816590
byts	1842566
wsbf	1569994
svfc	1837240
fmtx	1538927
cmrx	1117480
leu	1065059
rent	1468327
claa	1837739
cveo	1590584
fdmt	1650648
dtc	1870600
ois	1121484
asts	1780312
abst	1071058
faca	1839550
pyr	1743344
atcx	1751143
piai	1819175
ncv	1214935
aomr	1766478
ctt	1341141
prsr	1825473
ride	1759546
pfdr	1839132
gbio	1733294
hio	910068
hmpt	1830197
shbi	1035092
cnvy	1787640
sdhy	1812923
lian	1831283
uve	891166
muds	1820727
fulc	1680581
eto	1281926
sln	1479615
foun	1862068
kvsa	1841873
iva	1756594
psag	1833235
vldr	1745317
rrbi	1071236
prax	1689548
ysg	1819580
ppt	827773
atha	1620463
hyac	1819253
ymab	1722964
tg	850429
tnya	1858848
dcrd	1848959
loco	1606366
glad	1143513
cir	1091883
rfi	891290
ueic	101984
plmi	1840317
tyg	1268533
plby	1803914
soph	1840706
csta	1834032
calt	1795579
akro	1744659
bhb	743367
anac	1829558
asa	1230869
crd-a	25475
mpx	1129155
maps	1779474
sdac	1837248
hql	884121
cdr	761648
gecc	1675033
jri	1539337
rdbx	1820201
ctlp	896429
egy	894627
gbab	1495825
vff	1584549
ht	1063344
actd	1842279
grwg	1604868
hcne	1843205
kore	1855457
veri	1615165
brt	14846
btai	1720893
lsea	1721386
ezpw	876523
prch	1784535
smbc	916907
lvlu	1780201
akya	1711933
muj	1053988
hawel	46207
twcb	1845618
sier	1844135
ssaa	1830547
aggr	1842329
argu	1865377
krt	1758021
rdw	1819810
dhca	1838163
prth	1653558
hmco	1829042
idya	1676725
fath	1836176
arbk	1841675
zeus	917470
amnb	741516
hpf	1189740
esm	1841420
ambc	874501
kmf	1500096
acdi	1850316
atto	1606457
gbli	1494904
jmkj	1624140
rrac	1860879
fsrx	1834336
krnl	1832950
rkly	1852117
jro	1289213
apph	1807707
soi	1697500
altu	1822366
boom	34067
bhr	1574085
ezrg	1543066
jun	1838814
ngms	1821349
xpoa	1821742
miy	890393
adma	1368514
ktf	839533
gpac	1831979
htpa	1828817
altg	1759824
cova	1837160
igic	1794338
chaa	1838293
gxii	1826669
tsib	1832737
cznc	810958
emo	1517518
bsky	1846804
ffa	1291334
cto	23795
uk	1821424
hnst	1530979
sunl	1821850
vtru	1805012
slqt	1794783
vuzi	1463972
brw	826020
apei	1201792
bli	1689657
rdvt	1720116
lptv	1643988
rfmz	1817159
blua	1831006
blfy	1846017
bnft	1576169
nml	1562051
pmo	900422
sfst	1090009
hugs	1836894
amot	46129
bbig	1717556
gogn	1852940
aud	1067837
[truncated: 8,175 more rows]
